# Supplementary material for: Determinants of low measles vaccination coverage in children living in an endemic area
Source: Springer Nature journal article supplement (doi:10.1007/s00431-018-3289-5), 2018-11-14
Supplement: 431_2018_3289_MOESM1_ESM.pdf [file 431_2018_3289_MOESM1_ESM.pdf]

STROBE Statement—Checklist of items that should be included in reports of *cross-sectional studies*

|                              | <b>Item No</b> | <b>Recommendation</b>                                                                                                                                                                | <b>Manuscript</b>                                                                                       |
|------------------------------|----------------|--------------------------------------------------------------------------------------------------------------------------------------------------------------------------------------|---------------------------------------------------------------------------------------------------------|
| <b>Title and abstract</b>    | 1              | (a) Indicate the study’s design with a commonly used term in the title or the abstract                                                                                               | See title and abstract (Pages 1-3)                                                                      |
|                              |                | (b) Provide in the abstract an informative and balanced summary of what was done and what was found                                                                                  | See abstract (Page 3)                                                                                   |
| <b>Introduction</b>          |                |                                                                                                                                                                                      |                                                                                                         |
| Background/rationale         | 2              | Explain the scientific background and rationale for the investigation being reported                                                                                                 | See introduction (Pages 4)                                                                              |
| Objectives                   | 3              | State specific objectives, including any prespecified hypotheses                                                                                                                     | See introduction (Page 4)                                                                               |
| <b>Methods</b>               |                |                                                                                                                                                                                      |                                                                                                         |
| Study design                 | 4              | Present key elements of study design early in the paper                                                                                                                              | See Material and Methods<br>Study design and population<br>(Page 4-5)                                   |
| Setting                      | 5              | Describe the setting, locations, and relevant dates, including periods of recruitment, exposure, follow-up, and data collection                                                      | See Material and Methods<br>Study design and population<br>(Page 4-5)                                   |
| Participants                 | 6              | (a) Give the eligibility criteria, and the sources and methods of selection of participants                                                                                          | See Material and Methods<br>Study design and population<br>(Page 4-5)                                   |
| Variables                    | 7              | Clearly define all outcomes, exposures, predictors, potential confounders, and effect modifiers. Give diagnostic criteria, if applicable                                             | See Vaccination coverage and determinants of missed vaccination (Page 5)                                |
| Data sources/<br>measurement | 8*             | For each variable of interest, give sources of data and details of methods of assessment (measurement). Describe comparability of assessment methods if there is more than one group | See Statistical analysis and Immunization rate: best and worst case scenario (Pages 5-6)                |
| Bias                         | 9              | Describe any efforts to address potential sources of bias                                                                                                                            | See Study design and population and Discussion (Page 5 and 10)                                          |
| Study size                   | 10             | Explain how the study size was arrived at                                                                                                                                            | See Figure 1                                                                                            |
| Quantitative variables       | 11             | Explain how quantitative variables were handled in the analyses. If applicable, describe which groupings were chosen and why                                                         | See Statistical analysis and Vaccination coverage and determinants of missed vaccination<br>(Pages 5-6) |

|                     |     |                                                                                                                                                                                                              |                                                              |
|---------------------|-----|--------------------------------------------------------------------------------------------------------------------------------------------------------------------------------------------------------------|--------------------------------------------------------------|
| Statistical methods | 12  | (a) Describe all statistical methods, including those used to control for confounding                                                                                                                        | See Material and Methods (Pages 4-6)                         |
|                     |     | (b) Describe any methods used to examine subgroups and interactions                                                                                                                                          | See Statistical analysis (Page 6)                            |
|                     |     | (c) Explain how missing data were addressed                                                                                                                                                                  | See Figure 1                                                 |
|                     |     | (d) If applicable, describe analytical methods taking account of sampling strategy                                                                                                                           | Not Available                                                |
|                     |     | (e) Describe any sensitivity analyses                                                                                                                                                                        | See Statistical analysis (Page 6)                            |
| <b>Results</b>      |     |                                                                                                                                                                                                              |                                                              |
| Participants        | 13* | (a) Report numbers of individuals at each stage of study—eg numbers potentially eligible, examined for eligibility, confirmed eligible, included in the study, completing follow-up, and analysed            | See Figure 1                                                 |
|                     |     | (b) Give reasons for non-participation at each stage                                                                                                                                                         | See Figure 1                                                 |
|                     |     | (c) Consider use of a flow diagram                                                                                                                                                                           | See Figure 1                                                 |
| Descriptive data    | 14* | (a) Give characteristics of study participants (eg demographic, clinical, social) and information on exposures and potential confounders                                                                     | See Table 1                                                  |
|                     |     | (b) Indicate number of participants with missing data for each variable of interest                                                                                                                          | See Determinants of missed vaccination (Page 7) and Figure 1 |
| Outcome data        | 15* | Report numbers of outcome events or summary measures                                                                                                                                                         | See Results (Pages 9-10)                                     |
| Main results        | 16  | (a) Give unadjusted estimates and, if applicable, confounder-adjusted estimates and their precision (eg, 95% confidence interval). Make clear which confounders were adjusted for and why they were included | See Determinants of missed vaccination (Page 7)              |
|                     |     | (b) Report category boundaries when continuous variables were categorized                                                                                                                                    | See Table 1 and Results (Pages 6-7)                          |
|                     |     | (c) If relevant, consider translating estimates of relative risk into absolute risk for a meaningful time period                                                                                             | Not performed                                                |
| Other analyses      | 17  | Report other analyses done—eg analyses of subgroups and interactions, and sensitivity analyses                                                                                                               | See Results (Page 6-7) and Figure 3                          |
| <b>Discussion</b>   |     |                                                                                                                                                                                                              |                                                              |
| Key results         | 18  | Summarise key results with reference to study objectives                                                                                                                                                     | See Discussion (Pages 8-10)                                  |
| Limitations         | 19  | Discuss limitations of the study, taking into account sources of potential bias or imprecision. Discuss both direction and magnitude of any potential bias                                                   | See Discussion (Page 8-10)                                   |
| Interpretation      | 20  | Give a cautious overall interpretation of results considering objectives, limitations, multiplicity of                                                                                                       | See Discussion (Pages 8-10)                                  |

|                          |    |                                                                                                                                                               |                                                  |
|--------------------------|----|---------------------------------------------------------------------------------------------------------------------------------------------------------------|--------------------------------------------------|
|                          |    | analyses, results from similar studies, and other relevant evidence                                                                                           |                                                  |
| Generalisability         | 21 | Discuss the generalisability (external validity) of the study results                                                                                         | See Discussion (Pages 8-10)                      |
| <b>Other information</b> |    |                                                                                                                                                               |                                                  |
| Funding                  | 22 | Give the source of funding and the role of the funders for the present study and, if applicable, for the original study on which the present article is based | See Page 1<br>See Authors' contribution (Page 2) |

\*Give information separately for exposed and unexposed groups.
