# Supplementary figures and images for: Determinants of low measles vaccination coverage in children living in an endemic area
Source: Springer Nature journal article supplement (doi:10.1007/s00431-018-3289-5), 2018-11-14

**Determinants**

**Frequency of contraindications**

**Strategies to increase vaccination coverage**

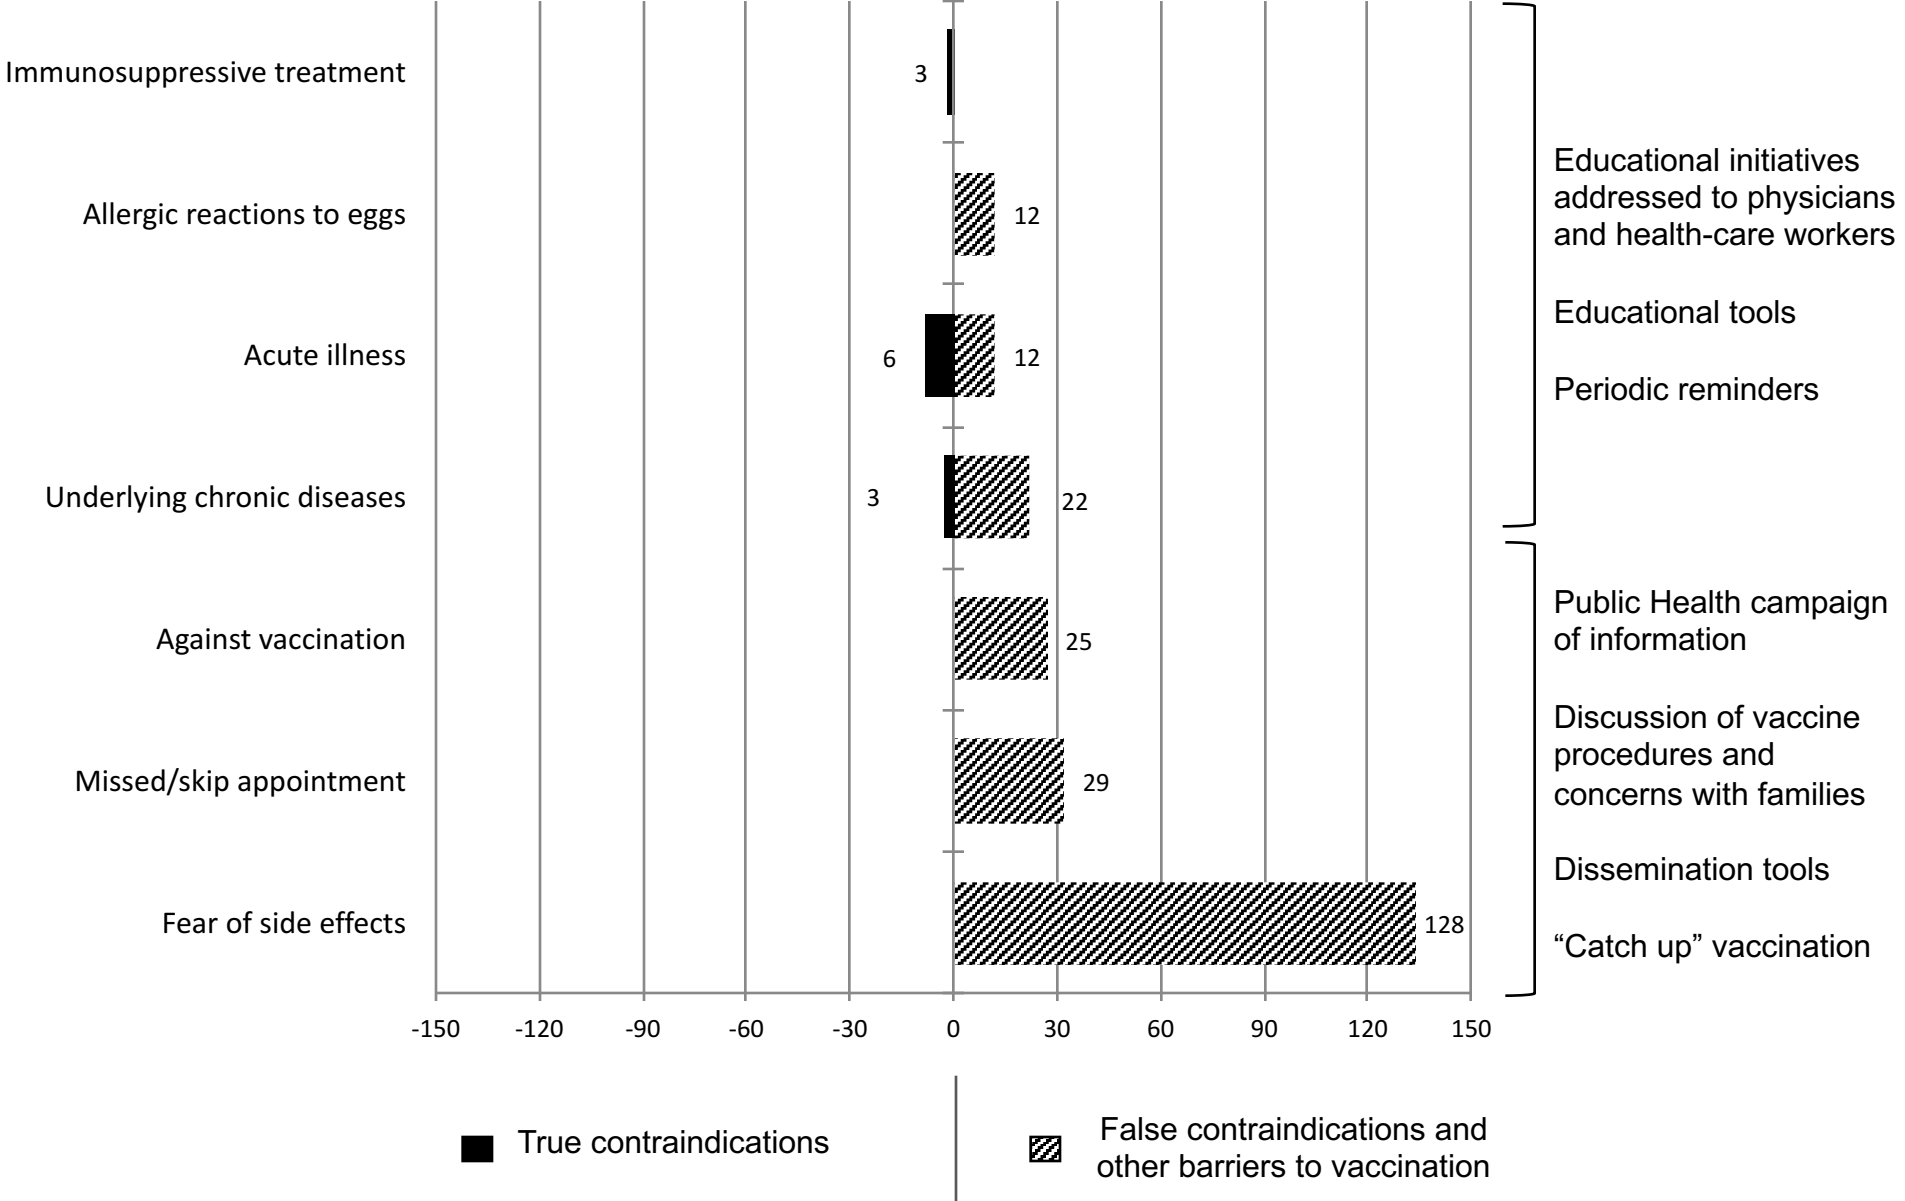

Supplement: 431_2018_3289_MOESM2_ESM.pdf [file 431_2018_3289_MOESM2_ESM.pdf]
